# Supplementary material for: Single-cell RNA sequencing and spatial transcriptomics reveal cancer-associated fibroblasts in glioblastoma with protumoral effects
Source: JCI journal article supplement (doi:10.1172/jci147087), 2023-02-28
Supplement: sd3 [file 3]

**CAF MARKERS**

---

|                  | Total # of cells | NPEE cells | ACTA2  | FAP   | PDGFRA | PDGFRB | PDPN   | TNC   | S100A4 | COL1A1 | NPEE cells expressing any CAF marker |
|------------------|------------------|------------|--------|-------|--------|--------|--------|-------|--------|--------|--------------------------------------|
|                  | 2640             | 1987       | 1466   | 111   | 176    | 253    | 393    | 742   | 341    | 1917   | 1719                                 |
| % cells of NPEE  |                  | 100%       | 73.80% | 5.60% | 8.90%  | 12.70% | 19.80% | 37.3% | 17.2%  | 96.5%  | 86.5%                                |
| % cells of Total |                  | 75.3%      | 55.50% | 4.20% | 6.70%  | 9.60%  | 14.90% | 28.1% | 12.9%  | 96.5%  | 65.1%                                |

**Supplemental Table 2. Number of cells isolated by serial trypsinization expressing various stromal markers by scRNA-seq.** Shown is the number of cells from scRNA-seq of cells isolated from serial trypsinization of patient GBM that were negative for pericyte, epithelial, endothelial, or immune cell markers (NPEE) and the number of NPEE cells expressing each of 8 CAF markers along with the number of NPEE cells expressing any CAF marker, a metric that gives a sense of what portion of these cells are CAFs.
